# Supplementary material
Source: PubMed Central journal article supplement (PMC9619751)
Supplement: deac220_supplementary_figure_s1.pdf [file deac220_supplementary_figure_s1.pdf]

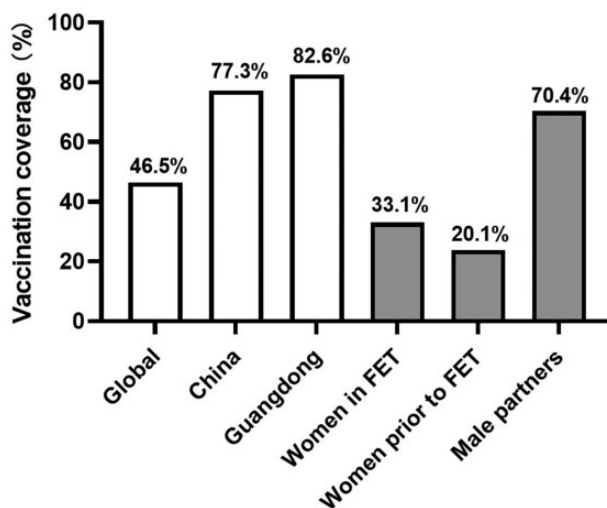

**Supplementary Figure S1. Vaccination status of different population.** Global and China's vaccination coverage were updated on 8 December 2021 (<https://edition.cnn.com/interactive/2021/health/global-covid-vaccinations/>). Vaccination coverage of Guangdong province was updated on 7 November 2021 (<http://gz.bendibao.com/news/20211119/content303134.shtml>). Women and their male partners' vaccination status were updated on 1 October 2021. Women with FET refers to the vaccinated women either before or after FET. Women prior to FET refers to those vaccinated prior to FET. The vaccination time points of male partners were not available in this study. FET, frozen-thawed embryo transfer.
