# Supplementary material
Source: PubMed Central journal article supplement (PMC9619751)
Supplement: deac220_supplementary_table_si.pdf [file deac220_supplementary_table_si.pdf]

**Supplementary Table S1** Baseline characteristics of the vaccinated versus unvaccinated patients after propensity score matching.

|                                | Vaccinated  | Unvaccinated | SD <sup>a</sup> |
|--------------------------------|-------------|--------------|-----------------|
| n                              | 492         | 1263         |                 |
| Female age (years old)         | 32.9 ± 4.0  | 32.8 ± 4.0   | 4.5             |
| Male age (years old)           | 34.3 ± 4.8  | 34.0 ± 4.7   | 7.3             |
| Infertility duration (year)    | 4.7 ± 2.9   | 4.7 ± 3.0    | 2.7             |
| AMH (ng/ml)                    | 5.66 ± 4.04 | 5.55 ± 4.03  | 2.7             |
| Total AFC                      | 21.8 ± 9.9  | 21.8 ± 10.3  | 0.5             |
| BMI (kg/m <sup>2</sup> )       | 22.1 ± 3.1  | 22.1 ± 3.2   | 0.7             |
| Type of infertility % (n)      |             |              | 3.6             |
| Primary                        | 51.6% (254) | 53.5% (676)  |                 |
| Secondary                      | 48.4% (238) | 46.5% (587)  |                 |
| Number of embryos for transfer |             |              | 0.8             |
| N = 1                          | 64.2% (316) | 67.8% (856)  |                 |
| N = 2                          | 35.8% (176) | 32.2% (407)  |                 |
| Embryo stage                   |             |              | 1.1             |
| Cleavage                       | 20.1% (99)  | 20.1% (254)  |                 |
| Blastocyst                     | 79.9% (393) | 79.9% (1009) |                 |

Values are mean ± SD or % (n). AMH, anti-Mullerian hormone; AFC, antral follicle counting.  
<sup>a</sup>SD of logit of propensity score, percent.
