# Supplementary material
Source: PubMed Central journal article supplement (PMC9619751)

human reproduction SUPPLEMENTARY DATA

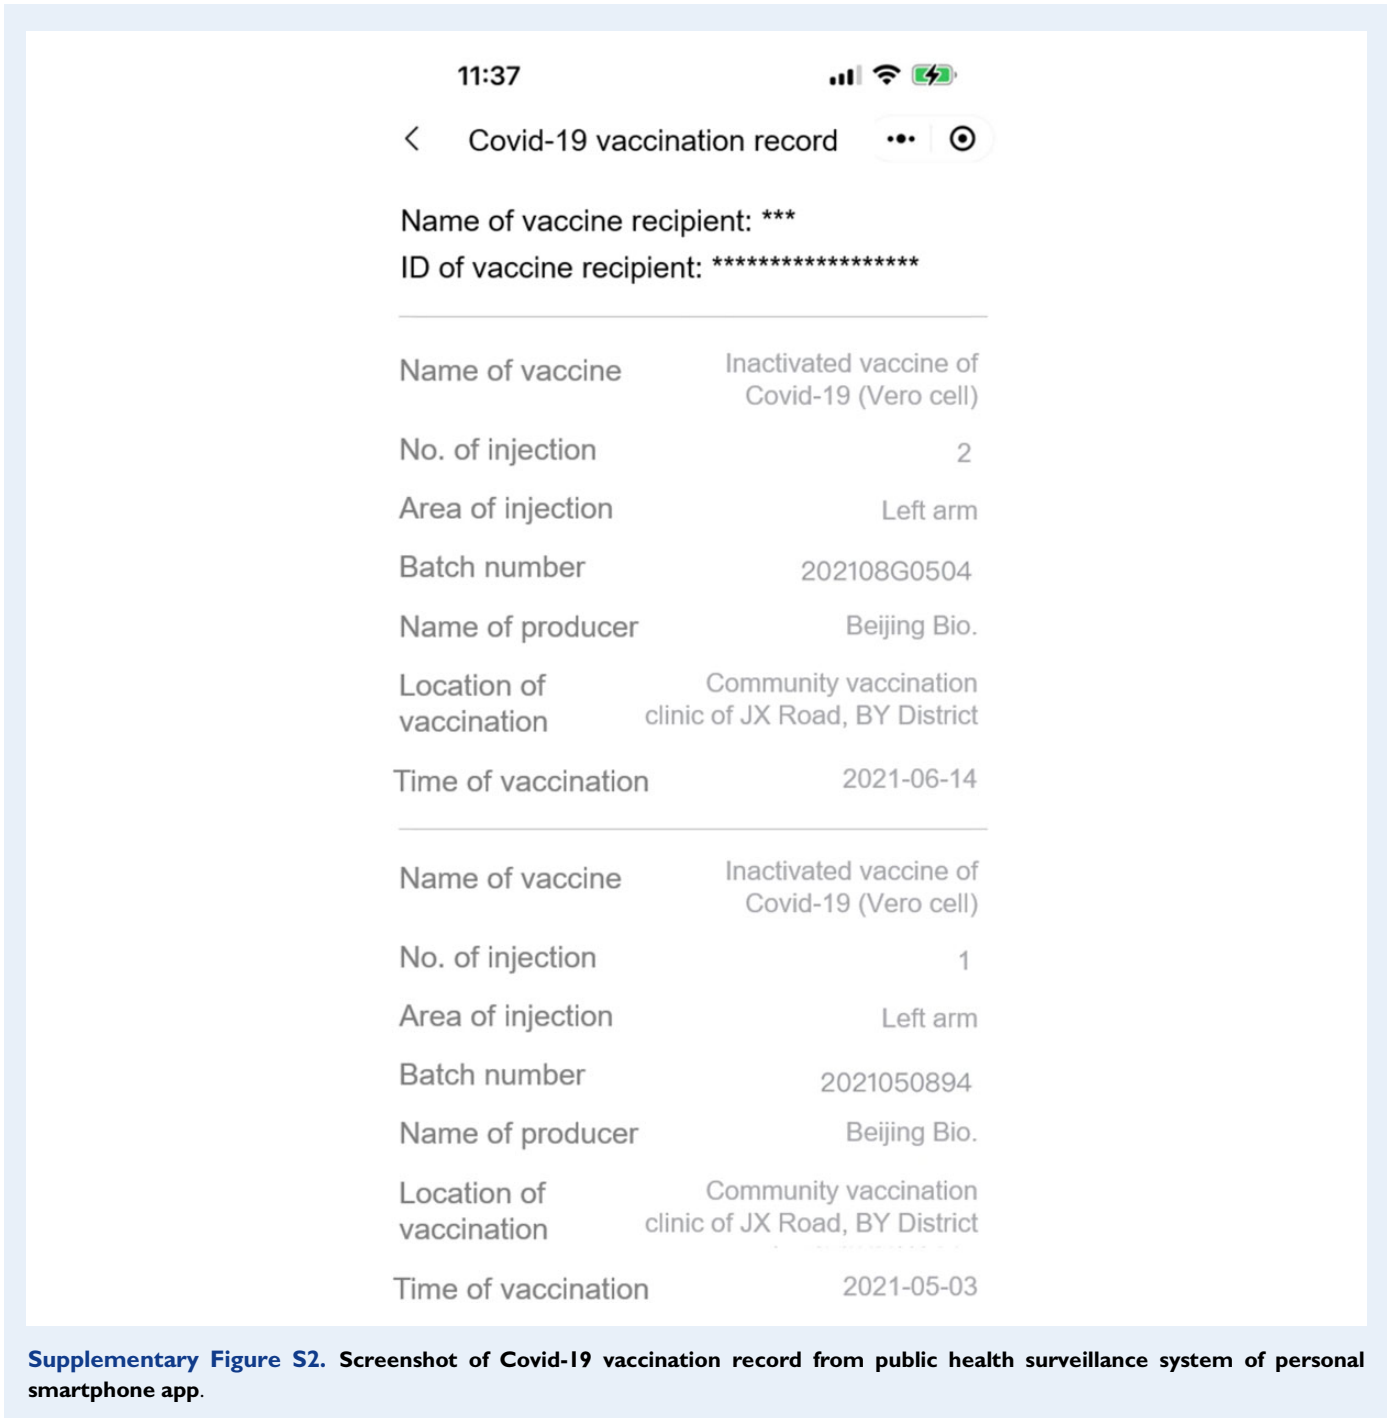

Supplement: deac220_supplementary_figure_s2.pdf [file deac220_supplementary_figure_s2.pdf]
